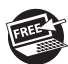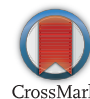

## Use of GLP-1 Receptor Agonists in Prader-Willi Syndrome: Report of Six Cases

*Diabetes Care* 2014;37:e76–e77 | DOI: 10.2337/dc13-2575

Danilo Fintini,<sup>1</sup> Graziano Grugni,<sup>2</sup>  
Claudia Brufani,<sup>1</sup> Sarah Bocchini,<sup>1</sup>  
Marco Cappa,<sup>3</sup> and Antonino Crinò<sup>1</sup>

A high incidence of glucose metabolism alterations (impaired fasting glucose, impaired glucose tolerance, and type 2 diabetes) has been observed in Prader-Willi syndrome (PWS) (7–40%), particularly after pubertal age and in obese subjects (1). Glucagon-like peptide 1 (GLP-1) receptor agonist (exenatide) and analog (liraglutide) are the new drugs recently introduced for type 2 diabetes that simultaneously reduce appetite and body weight, and their beneficial effects have been reported only in few cases with PWS (2–5).

We report, for the first time, the effects of long-term liraglutide or exenatide treatment in six genetically confirmed (3 deletion and 3 uniparental disomy of chromosome 15) (UPD) adult PWS patients (3 males, aged 20.7–37.7 years; all but one obese, BMI 28–57.2 kg/m<sup>2</sup>) never treated with growth hormone, affected by type 2 diabetes. All patients were treated at least 12 months with metformin (1,700–3,000 mg/day) and/or gliclazide (30 mg/day) before therapy with GLP-1 agonists/analogs. The range used for GLP-1 agonists was 1.2 to 1.8 mg/day for liraglutide (4 patients) and 20 µg/day for exenatide (2 patients) (Table 1).

At the time of the study, four patients suffered from hypertension and were treated with ACE inhibitors (patients 1

and 3), angiotensin receptor blockers (patient 3), and furosemide (patient 6). Four patients (patients 1, 3, 4, and 5) had hypertriglyceridemia and/or hypercholesterolemia and one was treated with statins (patient 5). Two individuals (patients 1 and 5) were undergoing sex steroid replacement. None of them experienced growth hormone therapy (Table 1).

Every 6 months, anthropometric (BMI and waist circumference) and metabolic parameters (glycemia, HbA<sub>1c</sub>) were evaluated. Continuous glycemic monitoring (iPRO2 Professional, Medtronic, MiniMed, Inc., Sylmar, CA) was performed for 72 h at the beginning of therapy and after 12 months.

Statistical analyses were performed using SPSS 17.00 (SPSS, Inc., Chicago, IL) software. Written informed consent was obtained by the patients and their parents.

During the 24 months of treatment, we detected a tendency to decrease BMI, HbA<sub>1c</sub>, and waist circumference and a significant decrease of mean glycemia during continuous glycemic monitoring at 12 months in respect to baseline (114.3 ± 10.7 mg/dL vs. 148.5 ± 20.5 mg/dL; *P* < 0.05).

Our data seem to support the previously reported efficacy of exenatide and liraglutide in these patients, with variability of response in single

patient and a tendency to improvement during the period of observation—in particular the glycemic control, especially during the first 12 months. Probably an increasing dose of GLP-1 analogs should be considered, but we have to take into consideration that liraglutide can delay gastric emptying and there are several reports of binge eating–induced and idiopathic gastric necrosis and fatal rupture in PWS (6). Therefore, some caution in the use of GLP-1 agonists and monitoring of gastric emptying during therapy may be appropriate in these patients.

In conclusion, we found our six PWS patients treated with GLP-1 agonists/analogs had a tendency to an improvement/stabilization of altered glucose metabolism and clinical parameters, more evident during the first 12 months of therapy. Moreover, these drugs seem to be well tolerated in PWS patients. Their relevance, however, remains to be fully established in a larger number of patients as to counteract the wide distribution of individual changes.

**Duality of Interest.** No potential conflicts of interest relevant to this article were reported.

**Author Contributions.** D.F. and G.G. wrote the manuscript and collected and elaborated on the data. C.B., S.B., and M.C. collected and elaborated on the data. A.C. wrote and revised

<sup>1</sup>Autoimmune Endocrine Diseases Unit, Bambino Gesù Children's Hospital, Research Institute, Palidoro, Rome, Italy

<sup>2</sup>Italian Auxological Institute Foundation, Piancavallo, Verbania, Italy

<sup>3</sup>Endocrinology and Diabetology Unit, Bambino Gesù Children's Hospital, Research Institute, Palidoro, Rome, Italy

Corresponding author: Antonino Crinò, antonino.crinò@opbg.net; dfintini@hotmail.com.

© 2014 by the American Diabetes Association. See <http://creativecommons.org/licenses/by-nc-nd/3.0/> for details.

**Table 1—Characteristics of the patients and variation of parameters and therapy during the period of therapy/observation of six PWS patients**

| Patient | Sex | Age (years) | Therapy                      | Basal |                                | 12 months |                                | 24 months |                                | Therapy                                                   |
|---------|-----|-------------|------------------------------|-------|--------------------------------|-----------|--------------------------------|-----------|--------------------------------|-----------------------------------------------------------|
|         |     |             |                              | BMI   | HbA <sub>1c</sub> % (mmol/mol) | BMI       | HbA <sub>1c</sub> % (mmol/mol) | BMI       | HbA <sub>1c</sub> % (mmol/mol) |                                                           |
| 1       | M   | 37.3        | Lrg 1.2 Met 1,700            | 36    | 7.6 (60)                       | 33        | 6.3 (45)                       | 32.4      | 6.9 (52)                       | Testosterone 250 mg<br>Ramipril 5 mg<br>Calcitriol 0.5 µg |
| 2       | M   | 20.7        | Exn 20 Met 3,000             | 28    | 8.2 (66)                       | 28        | 7 (53)                         | 26.5      | 6.8 (51)                       | Topiramate 40 mg                                          |
| 3       | M   | 27.7        | Lrg 1.2 Met 1,700            | 44    | 7.5 (58)                       | 44        | 6.9 (52)                       | 44        | 7.4 (57)                       | Ramipril 5 mg<br>Candesartan 8 mg                         |
| 4       | F   | 30.4        | Lrg 1.2 Met 3,000            | 50    | 8.7 (72)                       | 48        | 7.3 (56)                       | 48.1      | 7.8 (62)                       | Allopurinol 150 mg                                        |
| 5       | F   | 37.1        | Lrg 1.8 Met 2,000<br>Glic 30 | 30    | 8.3 (67)                       | 31        | 8.6 (70)                       | 30.2      | 9.3 (78)                       | Simvastatin 20 mg EEPP                                    |
| 6       | F   | 34.5        | Exn 20 Met 3,000             | 57    | 9.5 (80)                       | 59        | 9.5 (80)                       | 58.5      | 10.1 (87)                      | Furosemide 25 mg                                          |

All therapies are intended daily except for testosterone (patient 1), which was administered monthly. EEPP, estroprogestin; Exn, exenatide (µg/day); F, female; Glic, gliclazide (mg/day); Lrg, liraglutide (mg/day); M, male; Met, metformin (mg/day).

the manuscript. A.C. is the guarantor of this work and, as such, had full access to all the data in the study and takes responsibility for the integrity of the data and the accuracy of the data analysis.

**Prior Presentation.** This study was presented as an oral communication at the International Prader-Willi Syndrome Organisation (IPWSO), Cambridge, U.K., 18–19 July 2013.

## References

- Butler JV, Whittington JE, Holland AJ, Boer H, Clarke D, Webb T. Prevalence of, and risk factors for, physical ill-health in people with Prader-Willi syndrome: a population-based study. *Dev Med Child Neurol* 2002;44:248–255
- Seetho IW, Jones G, Thomson GA, Fernando DJ. Treating diabetes mellitus in Prader-Willi syndrome with exenatide. *Diabetes Res Clin Pract* 2011;92:e1–e2
- Cyganek K, Koblik T, Kozek E, Wojcik M, Starzyk J, Malecki MT. Liraglutide therapy in Prader-Willi syndrome. *Diabet Med* 2011;28:755–756
- Sze L, Purtell L, Jenkins A, et al. Effects of a single dose of exenatide on appetite, gut hormones, and glucose homeostasis in adults with Prader-Willi syndrome. *J Clin Endocrinol Metab* 2011;96:E1314–E1319
- Senda M, Ogawa S, Nako K, Okamura M, Sakamoto T, Ito S. The glucagon-like peptide-1 analog liraglutide suppresses ghrelin and controls diabetes in a patient with Prader-Willi syndrome. *Endocr J* 2012;59:889–894
- Stevenson DA, Heinemann J, Angulo M, et al. Gastric rupture and necrosis in Prader-Willi syndrome. *J Pediatr Gastroenterol Nutr* 2007;45:272–274
